# Supplementary material for: Highly Sensitive Flow Cytometry Allows Monitoring of Changes in Circulating Immune Cells in Blood After Tdap Booster Vaccination
Source: PubMed Central journal article supplement (PMC8223751; doi:10.3389/fimmu.2021.666953), 2021-06-10
Supplement: Table_1.pdf [file Table_1.pdf]

**Supplementary Table 1:** Exclusion criteria for this study.

| Subjects who meet any of the following criteria will be excluded from participation in this study. The subject:                       | Applicable to subject |
|---------------------------------------------------------------------------------------------------------------------------------------|-----------------------|
| Has an auto-immune disease                                                                                                            | YES/NO                |
| Has an immune deficiency                                                                                                              | YES/NO                |
| Has a bleeding disorder                                                                                                               | YES/NO                |
| Underwent splenectomy                                                                                                                 | YES/NO                |
| Receives immunosuppressive medication                                                                                                 | YES/NO                |
| Receives medication which influences blood clotting                                                                                   | YES/NO                |
| Underwent active (clinically manifested) <i>Bordetella pertussis</i> infection at any point in life or had contact with such a person | YES/NO                |
| Received vaccination against <i>Bordetella pertussis</i> in the past 10 years                                                         | YES/NO                |
| Has Hb level below 8.4 g/dL (male) or below 7.8 g/dL (female)                                                                         | YES/NO                |
| Is pregnant or breast feeding                                                                                                         | YES/NO                |
| Had an allergic response to vaccination in the past                                                                                   | YES/NO                |
